# Supplementary material
Source: PubMed Central journal article supplement (PMC4260610)
Supplement: pnas.201418889SI.pdf [file pnas.201418889SI.pdf]

# Supporting Information

Pringle et al. 10.1073/pnas.1418889111

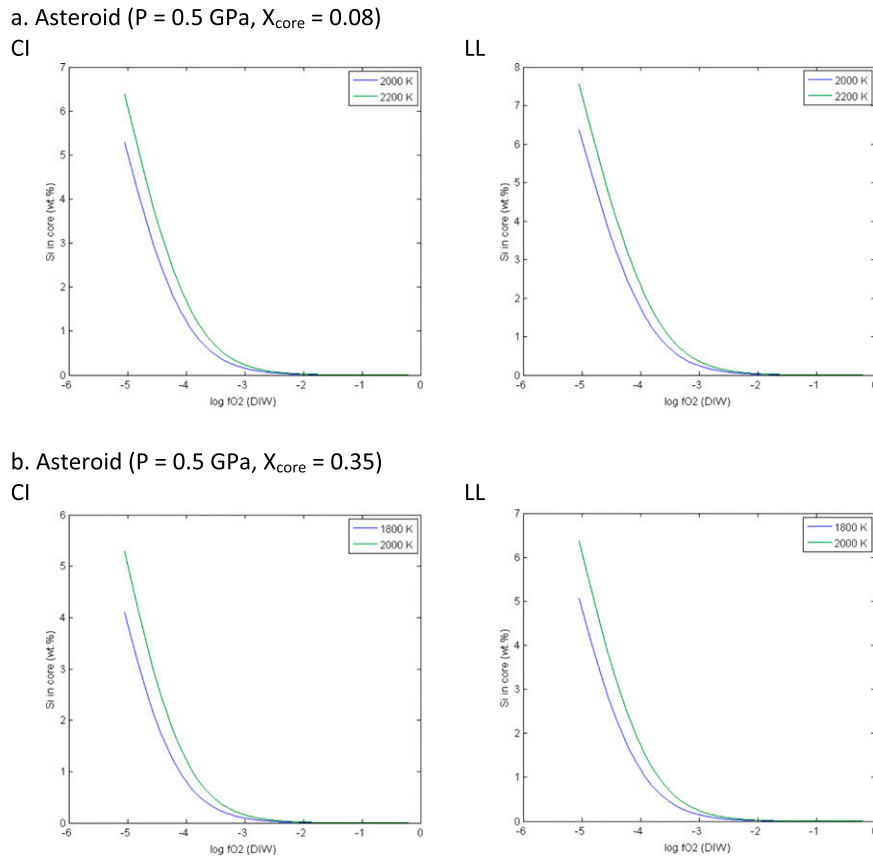

**Fig. S1.** Modeled oxygen fugacity (expressed as deviation from the iron-wüstite buffer) during metal-silicate equilibration as a function of Si content in the core for different angrite parent body scenarios, including (A) asteroid with 8% core by mass and (B) asteroid with 35% core by mass and corresponding estimates of pressure (P), core mass fraction ( $X_{\text{core}}$ ), and temperature. Elemental Si abundances in the APB are modeled for two end-member cases: CI chondrite composition (10 wt% Si) and LL chondrite composition (18 wt% Si). A full description of the Si core-mantle partitioning model is given in ref. 1.

1. Pringle EA, Savage PS, Badro J, Barrat J-A, Moynier F (2013) Redox state during core formation on asteroid 4-Vesta. *Earth Planet Sci Lett* 373:75–82.

**Table S1. Silicon isotope data for standard and meteorite samples relative to terrestrial basalt BHVO-2 as the bracketing standard**

| Sample    | Group    | $\delta^{29}\text{Si}_{\text{BHVO-2}}$ | 2 SD | 2 SE | $\delta^{30}\text{Si}_{\text{BHVO-2}}$ | 2 SD | 2 SE | n |
|-----------|----------|----------------------------------------|------|------|----------------------------------------|------|------|---|
| NBS28     |          | 0.15                                   | 0.05 | 0.02 | 0.28                                   | 0.07 | 0.03 | 7 |
| Angrites  |          |                                        |      |      |                                        |      |      |   |
| D'Orbigny | Quenched | 0.03                                   | 0.04 | 0.01 | 0.04                                   | 0.04 | 0.01 | 8 |
| NWA4590   | Plutonic | 0.03                                   | 0.05 | 0.02 | 0.06                                   | 0.06 | 0.02 | 7 |

$\delta^{29}\text{Si}_{\text{BHVO-2}}$  and  $\delta^{30}\text{Si}_{\text{BHVO-2}}$  are the Si ratios expressed relative to BHVO-2 as the bracketing standard. 2 SD,  $2 \times \text{SD}$ ; 2 SE,  $2 \times \text{SD}/\sqrt{n}$ , where n is number of measurements.

**Table S2. Calculated Si in the core for angrite parent body models**

| Parent body model | T, K  | P, GPa | $X_{\text{core}}$ | Fractionation factor    | Si in core, wt% |
|-------------------|-------|--------|-------------------|-------------------------|-----------------|
| Asteroid          | 1,800 | 0.5    | 0.35              | Shahar et al., 2011 (1) | $2.7 \pm 0.8$   |
|                   |       |        |                   | Hin et al., 2014 (2)    | $4.4 \pm 1.3$   |
| Asteroid          | 2,200 | 0.5    | 0.08              | Shahar et al., 2011 (1) | $17.1 \pm 4.9$  |
|                   |       |        |                   | Hin et al., 2014 (2)    | $28.8 \pm 8.3$  |

1. Shahar A, et al. (2011) High-temperature Si isotope fractionation between iron metal and silicate. *Geochim Cosmochim Acta* 75(2):7688–7697.

2. Hin RC, Fitoussi C, Schmidt MW, Bourdon B (2014) Experimental determination of the Si isotope fractionation factor between liquid metal and liquid silicate. *Earth Planet Sci Lett* 387: 55–66.
